# Supplementary material
Source: publisher site journal article supplement (https://www.dovepress.com/get_supplementary_file.php?f=284474.xlsx)
Supplement: Supplementary file 2 [file get_supplementary_file.php]

## Sheet: Procedure Codes
	Table S1. Procedure Codes (CPT) and Associated Description
	Procedure Code	Procedure Description
	'66170' '66172'	Trabeculectomy
	66180' '66185' ‘L8612’, '66183' '0192T'	Aqueous shunt or Express shunt
	65855'	Laser Trabeculoplasty
	'65820'	Trabectome
	0191T', ‘0253T', ‘0191T + 0376T’	iStent
	'66710' '66711'	Ciliary body destruction/ECP
	0176T' '0177T' '66174' '66175' ‘65850’	Canaloplasty or GATT or KDB
	‘0449T’ ‘0450T’	Xen
	‘0474T’	Cypass

## Sheet: Comorbidities
	Table S2. Comorbidities and Associated ICD-10 and ICD-9 Codes
	Disease State	ICD-10	ICD-9
	Exudative AMD	H35.32	362.52
	non-exudative AMD	H35.31	362.51
	Diabetic Retinopathy	E10.3	250.5
		E11.35	250.5
	anxiety	F41	300.02
	Depression	F32	296.2
		F33	296.3

## Sheet: CCI
	Table S3. Codes for CCI Calculation
	Condition	ICD 9 CM	ICD 10	Weights	Updated Weight
	Myocardial infarction	410.x, 412.x	I21.x, I22.x, I25.2	1	0
	Congestive heart failure	398.91, 402.01, 402.11, 402.91,	I09.9, I11.0, I13.0, I13.2, I25.5, I42.0,	1	2
		404.01, 404.03, 404.11,	I42.5–I42.9, I43.x, I50.x, P29.0
		404.13, 404.91, 404.93,
		425.4–425.9, 428.x
	Peripheral vascular Disease	093.0, 437.3, 440.x, 441.x,	I70.x, I71.x, I73.1, I73.8, I73.9, I77.1,	1	0
		443.1–443.9, 447.1, 557.1,	I79.0, I79.2, K55.1, K55.8, K55.9,
		557.9, V43.4	Z95.8, Z95.9
	Cerebrovascular disease	362.34, 430.x–438.x	G45.x, G46.x, H34.0, I60.x–I69.x	1	0
	Dementia	290.x, 294.1, 331.2	F00.x–F03.x, F05.1, G30.x, G31.1	1	2
	Chronic pulmonary disease	416.8, 416.9, 490.x–505.x,	I27.8, I27.9, J40.x–J47.x, J60.x–J67.x,	1	1
		506.4, 508.1, 508.8	J68.4, J70.1, J70.3
	Rheumatic disease	446.5, 710.0–710.4, 714.0–	M05.x, M06.x, M31.5, M32.x–M34.x,	1	1
		714.2, 714.8, 725.x	M35.1, M35.3, M36.0
	Peptic ulcer disease	531.x–534.x	K25.x–K28.x	1	0
	Mild liver disease	070.22, 070.23, 070.32, 070.33,	B18.x, K70.0–K70.3, K70.9,	1	2
		070.44, 070.54, 070.6, 070.9,	K71.3–K71.5, K71.7, K73.x, K74.x,
		570.x, 571.x, 573.3, 573.4,	K76.0, K76.2–K76.4, K76.8, K76.9,
		573.8, 573.9, V42.7	Z94.4
	Diabetes without chronic complications	250.0–250.3, 250.8, 250.9	E10.0, E10.1, E10.6, E10.8, E10.9,	1	0
			E11.0, E11.1, E11.6, E11.8, E11.9,
			E12.0, E12.1, E12.6, E12.8, E12.9,
			E13.0, E13.1, E13.6, E13.8, E13.9,
			E14.0, E14.1, E14.6, E14.8, E14.9
	Diabetes with chronic complications	250.4–250.7	E10.2–E10.5, E10.7, E11.2–E11.5,	2	1
			E11.7, E12.2–E12.5, E12.7, E13.2–
			E13.5, E13.7, E14.2–E14.5, E14.7
	Hemiplegia or paraplegia	334.1, 342.x, 343.x, 344.0–	G04.1, G11.4, G80.1, G80.2, G81.x,	2	2
		344.6, 344.9	G82.x, G83.0–G83.4, G83.9
	Renal disease	403.01, 403.11, 403.91, 404.02,	I12.0, I13.1, N03.2–N03.7, N05.2–	2	1
		404.03, 404.12, 404.13,	N05.7, N18.x, N19.x, N25.0, Z49.0–
		404.92, 404.93, 582.x,	Z49.2, Z94.0, Z99.2
		583.0–583.7, 585.x, 586.x,
		588.0, V42.0, V45.1, V56.x
	Any malignancy,	140.x–172.x, 174.x–195.8,	C00.x–C26.x, C30.x–C34.x, C37.x–	2	2
	including lymphoma	200.x–208.x, 238.6	C41.x, C43.x, C45.x–C58.x, C60.x–
	and leukemia, except		C76.x, C81.x–C85.x, C88.x,
	malignant neoplasm of		C90.x–C97.x
	skin
	Moderate or severe liver	456.0–456.2, 572.2–572.8	I85.0, I85.9, I86.4, I98.2, K70.4,	3	4
	disease		K71.1, K72.1, K72.9, K76.5, K76.6,
			K76.7
	Metastatic solid tumor	196.x–199.x	C77.x–C80.x	6	6
	AIDS/HIV	042.x–044.x	B20.x–B22.x, B24.x	6	4

## Sheet: Demographics
		Table S4. Clinical and Demographic Characteristics of Patients with NTG
		Characteristic	Unilateral					Bilateral
			Mild	Moderate	Severe	Indeterminate		Mild	Moderate	Severe	Indeterminate
			(n = 727)	(n = 581)	(n = 249)	(n = 150)		(n = 2149)	(n = 1420)	(n = 542)	(n = 512)
		Table 1a. Demographic
		Age Group, n (%)
		40 - 44 y	13 (1.8)	10 (1.7)	4 (1.6)	3 (2.0)		52 (2.4)	20 (1.4)	9 (1.7)	9 (1.8)
		45 - 49 y	32 (4.4)	23 (4.0)	7 (2.8)	6 (4.0)		118 (5.5)	49 (3.5)	14 (2.6)	27 (5.3)
		50 - 54 y	50 (6.9)	48 (8.3)	17 (6.8)	15 (10.0)		188 (8.7)	85 (6.0)	36 (6.6)	49 (9.6)
		55 - 59 y	112 (15.4)	74 (12.7)	37 (14.9)	26 (17.3)		348 (16.2)	192 (13.5)	58 (10.7)	76 (14.8)
		60 - 64 y	159 (21.8)	112 (19.3)	42 (16.9)	29 (19.3)		473 (22.0)	265 (18.7)	87 (16.1)	98 (19.1)
		65 - 69 y	80 (11.0)	47 (8.1)	20 (8.0)	13 (8.7)		231 (10.7)	135 (9.5)	55 (16.1)	59 (11.5)
		70 -74 y	94 (12.9)	62 (10.7)	22 (8.8)	18 (12.0)		218 (10.1)	157 (11.1)	57 (10.1)	60 (11.7)
		≥ 75 y	187 (25.7)	205 (35.3)	100 (40.2)	40 (26.7)		521 (24.2)	517 (36.4)	226 (41.7)	134 (26.2)
		Age Years, mean (SD)	66.7. (11.9)	68.3 (12.3)	69.6 (12.9)	66.5 (12.2)		65.6 (11.9)	69.1 (12.3)	70.9 (13.2)	66.5 (12.2)
		Gender
		Male, n (%)	280 (38.5)	258 (44.4)	102 (40.9)	61 (40.7)		870 (40.9)	585 (41.2)	229 (42.3)	221 (43.2)
		Geographic Region, n (%)
		Northeast	172 (23.7)	139 (23.9)	55 (22.1)	37 (24.7)		505 (23.5)	377 (26.5)	139 (25.6)	112 (21.9)
		North Central	215 (30.0)	176 (30.3)	91 (36.5)	30 (20.0)		600 (27.9)	364 (25.6)	161 (29.7)	97 (18.9)
		South	220 (30.3)	178 (30.6)	71 (28.5)	55 (36.7)		773 (36.0)	487 (34.3)	170 (31.4)	203 (39.6)
		West	119 (16.4)	88 (15.1)	32 (12.9)	28 (18.7)		269 (12.5)	191 (13.5)	72 (13.3)	100 (19.5)
		Unknown	1 (0.0)	0 (0.0)	0 (0.0)	0 (0.0)		2 (0.0)	1 (0.0)	0 (0.0)	0 (0.0)
		Type of Insurance, n (%)
		Basic/Major Medical	11. (1.5)	11 (1.9)	0 (0.0)	4 (2.7)		23 (1.1)	13 (0.9)	4 (0.7)	7 (1.4)
		Comprehensive	181 (24.9)	149 (25.6)	82 (32.9)	23 (15.3)		449 (20.9)	353 (24.9)	158 (29.2)	116 (22.7)
		EPO	2 (0.3)	3 (0.5)	2 (0.8)	0 (0.0)		15 (0.7)	11 (0.7)	3 (0.6)	1 (0.2)
		HMO	66 (9.1)	72 (12.4)	11 (4.4)	21 (14.0)		188 (8.7)	120 (8.5)	44 (8.1)	73 (14.3)
		POS	39 (5.4)	25 (4.3)	12 (4.8)	15 (10.0)		89 (4.1)	69 (4.9)	23 (4.2)	22 (4.3)
		PPO	342 (47.0)	267 (46.0)	116 (46.6)	72 (48.0)		1089 (50.7)	713 (50.2)	264 (48.7)	241 (47.0)
		PPO with Capitation	7 (1.0)	3 (0.5)	2 (0.8)	3 (2.0)		9 (0.4)	8 (0.6)	1 (0.2)	4 (0.8)
		CDHP	47 (6.5)	33 (5.7)	17 (6.8)	10 (6.7)		185 (8.6)	96 (6.8)	30 (5.5)	31 (6.1)
		HDHP	32 (4.4)	18 (3.1)	7 (2.8)	2 (1.3)		102 (4.7)	37 (2.6)	15 (2.8)	17 (3.3)
		Table 1b. Clinical*
		Prevalence of Comorbid Conditions, n (%)
		Non-exudative AMD	43 (5.9)	50 (8.6)	19 (7.6)	13 (8.7)		168 (7.8)	111 (7.8)	62 (11.4)	38 (7.4)
		Exudative AMD	12 (1.7)	7 (1.2)	7 (2.8)	7 (4.7)		20 (0.9)	23 (1.6)	11 (2.0)	8 (1.6)
		Diabetic Retinopathy	6 (0.8)	8 (1.4)	2 (0.8)	3 (2.0)		40 (1.9)	23 (1.6)	14 (2.6)	16 (3.1)
		Anxiety	47 (6.5)	32 (5.5)	10 (4.0)	10 (6.7)		141 (6.6)	104 (7.3)	26 (4.8)	26 (5.1)
		Depression	40 (5.5)	35 (6.0)	11 (4.4)	10 (6.7)		146 (6.8)	95 (6.7)	29 (5.4)	33 (6.4)
		CCI Score, n (%)
		0	456 (62.7)	376 (64.7)	160 (64.3)	87 (58.0)		1323 (61.6)	867 (61.1)	317 (58.5)	303 (59.2)
		1	120 (16.5)	85 (14.6)	29 (11.6)	30 (20.0)		347 (16.1)	209 (14.7)	82 (15.1)	85 (16.6)
		2	84 (11.6)	61 (10.5)	30 (12.0)	18 (12.0)		281 (13.1)	183 (12.9)	84 (15.5)	77 (15.0)
		3+	67 (9.2)	59 (10.2)	30 (12.0)	15 (10.0)		198 (9.2)	161 (11.3)	59 (10.9)	47 (9.2)
		CCI Score, mean (SD)	0.85 (1.6)	0.80 (1.5)	0.9 (1.6)	0.85 (1.4)		0.82 (1.4)	0.89 (1.5)	0.94 (1.6)	0.84 (1.3)
		* Clinical characteristics searched one year prior to up to index
	Abbreviations: AMD, age-related macular degeneration; CCI, Charlson Comorbidity Index; CDHP, consumer-driven health plans; EPO, exclusive provider organization; HDHP, high-deductible health plan; HMO, health maintenance organization; PPO, preferred provider organization; SD, standard deviation

## Sheet: HCRU
	Table S5. Total Healthcare Resource Utilization
	Outcome					Unilateral					Moderate				Severe				Indeterminate
						Mild	Moderate	Severe	Indeterminate
						(n = 727)	(n = 581)	(n = 249)	(n = 150)		Unadjusted		Adjusted		Unadjusted		Adjusted		Unadjusted		Adjusted
											(95% CI)		(95% CI)		(95% CI)		(95% CI)		(95% CI)		(95% CI)
	Eye related OP visits, n
				# of visits, mean (SD)		4.36 (2.24)	4.51 (2.39)	4.94 (2.73)	4.46 (2.92)		0.15 (-0.08, 0.38)		0.16 (-0.07, 0.39)		0.57 (0.26, 0.89)***		0.60 (0.28, 0.91)***		0.10 (-0.26, 0.48)		0.07 (-0.30, 0.45)
		NTG related OP visits as a subset of all visits, n
				# of visits, mean (SD)		3.65 (1.44)	3.86 (1.74)	4.05 (1.82)	3.70 (1.90)		0.20 (-0.01, 0.42)		0.20 (-0.01, 0.41)		0.40 (0.12, 0.69)**		0.43 (0.14, 0.72)**		0.06 (-0.28, 0.40)		0.06 (-0.28, 0.41)
		Procedure-related OP visits as a subset of all visits, n
				# of visits, mean (SD)		0.14 (0.46)	0.19 (0.57)	0.19 (0.50)	0.11 (0.39)		0.05 (0.00, 0.09)*		0.05 (0.00, 0.09)*		0.05 (-0.01, 0.11)		0.06 (-0.00, 0.12)		-0.03 (-0.09, 0.04)		-0.03 (-0.09, 0.04)
	Glaucoma related prescriptions, n+
				# patients with >=1, n (%)		707 (97.2)	568 (97.8)	243 (97.8)	147 (98.0)
				# unique fills, mean (SD)		5.35 (3.66)	6.62 (4.69)	6.33 (4.14)	5.85 (3.84)		1.27 (0.59, 1.37)***		1.18 (0.89, 1.48)***		0.98 (0.59, 1.37)**		0.92 (0.53, 1.31)**		0.50 (0.03, 0.98)*		0.51 (0.04, 1.00)*
				# days supply, mean (SD)		253.95 (171.99)	283.20 (201.78)	295.43 (213.47)	256.17 (161.12)		29.25 (3.01, 55.49)*		26.16 (-0.18, 52.50)		41.47 (5.20, 77.75)*		40.65 (4.35, 76.94)*		2.22 (-38.56, 42.99)		2.16 (-39.07, 43.40)
	Outcome					Bilateral					Moderate				Severe				Indeterminate
						Mild	Moderate	Severe	Indeterminate
						(n = 2149 )	(n = 1420)	(n = 542)	(n = 512)		Unadjusted		Adjusted		Unadjusted		Adjusted		Unadjusted		Adjusted
											(95% CI)		(95% CI)		(95% CI)		(95% CI)		(95% CI)		(95% CI)
	Eye related OP visits, n
				# of visits, mean (SD)		4.10 (2.06)	4.43 (2.35)	5.03 (2.95)	4.29 (2.36)		0.33 (0.19, 0.47)***		0.29 (0.15, 0.44)***		0.93 (0.72, 1.14)***		0.87 (0.66, 1.08)***		0.19 (-0.01, 0.39)		0.18 (-0.02, 0.38)
		NTG related OP visits as a subset of all visits, n
				# of visits, mean (SD)		3.51 (1.43)	3.76 (1.60)	4.15 (2.10)	3.62 (1.62)		0.25 (0.12, 0.38)***		0.24 (0.11, 0.37)***		0.63 (0.45, 0.82)***		0.61 (0.42, 0.81)***		0.10 (-0.08, 0.29)		0.10 (-0.08, 0.29)
		Procedure-related OP visits as a subset of all visits, n
				# of visits, mean (SD)		0.12 (0.46)	0.15 (0.50)	0.23 (0.60)	0.11 (0.45)		0.03 (0.00, 0.06)*		0.03 (0.01, 0.06)**		0.11 (0.06, 0.15)***		0.11 (0.07, 0.15)***		-0.01 (-0.04, 0.02)		-0.01 (-0.04, 0.03)
	Glaucoma related prescriptions, n+
				# patients with >=1, n (%)		2096 (97.5)	1390 (97.9)	530 (97.8)	487 (95.1)
				# unique fills, mean (SD)		5.93 (3.98)	6.62 (4.73)	8.75 (6.18)	6.10 (4.36)		0.69 (0.37, 1.00)***		0.55 (0.24, 0.87)***		2.82 (2.28, 3.35)***		2.54 (2.01, 3.07)***		0.16 (-0.28, 0.62)		0.16 (-0.30, 0.62)
				# days supply prescriptions, mean (SD)		256.14 (158.50)	293.10 (187.82)	380.87 (270.11)	279.44 (186.38)		36.96 (21.05, 52.87)***		29.39 (13.38, 45.39)***		124.73 (96.58, 152.87)***		111.28 (83.47, 139.09)***		23.30 (-0.29, 46.89)		18.23 (-5.50, 41.95)
	Notes: *p < 0.05, **p < 0.01, ***p < 0.001; adjusted models controlled for age, sex, geographical region, insurance type, and CCI; all inpatient values were 0 and therefore inpatient claims were excluded from the report; prescription metricss were estimated using a negative binomial model, all other counts were modeled with a poisson distribution and every model used "Mild" as the reference categ…
	Abbreviations: CI, confidence interval; NTG, Normal Tension Glaucoma; OP, outpatient; SD, standard deviation

## Sheet: Costs
		Table S6. Cost of Healthcare Resource Utilization by Levels of Severity, Stratified by Laterality
		Outcome					Unilateral					Moderate				Severe				Indeterminate
							Mild	Moderate	Severe	Indeterminate
							(n = 727)	(n = 581)	(n = 249)	(n = 150)		Unadjusted		Adjusted		Unadjusted		Adjusted		Unadjusted		Adjusted
												(95% CI)		(95% CI)		(95% CI)		(95% CI)		(95% CI)		(95% CI)
		Eye-related OP visits, mean (SD)
				Per User
					Patient Related		$230 (321)	$261 (420)	$339 (569)	$239 (386)		30 (-12, 71)		39 (1.1, 78)*		109 (39, 178)***		119 (54, 183)***		8 (-56, 72)		-3 (-58, 53)
					Payer Related		$622 (1776)	$662 (2387)	$881 (2739)	$790 (1443)		40 (-178, 258)		26 (-171, 223)		258 (-109, 624)		279 (-65, 622)		167 (-249, 583)		263 (-156, 682)
			NTG related OP visits as a subset of all OAG OP visits, mean (SD)
				Per User
					Patient Related		$192 (260)	$218 (355)	$261 (423)	$209 (367)		26 (-9, 60)		34 (3.3, 64)*		69 (15, 123)***		88 (38, 137)***		17 (-38, 73)		18 (-30, 650)
					Payer Related		$421 (1146)	$485 (1812)	$607 (2179)	$513 (822)		64 (-95, 222)		61 (-96, 218)		185 (-73, 442)		184 (-72, 439)		91 (-186, 369)		91 (-187, 110)
			Procedure-related OP visits as a subset of all visits, mean (SD)
				Per User
					Patient Related		$139 (299)	$213 (358)	$248 (672)	$225 (368)		73 (-49, 195)		74 (-49, 195)		109 (-72, 290)		107 (-74, 288)		85 (-177, 348)		85 (-177, 347)
					Payer Related		$722 (1642)	$763 (1092)	$1571 (5071)	$1060 (1708)		40 (-487, 567)		-		849 (-333, 2031)		-		337 (-977, 1652)		-
				Per Patient
					Patient Related		$15 (106)	$26 (142)	$36 (267)	$19 (122)		11 (-4, 27)		11 (-4, 27)		21 (-9, 51)		21 (-9, 52)		5 (-17, 26)		5 (-17, 27)
					Payer Related		$77 (576)	$93 (454)	$227 (1984)	$92 (570)		17 (-48, 81)		-		151 (-46, 347)		-		15 (-92, 123)		-
		Glaucoma related prescriptions, mean (SD)
				Per User
					Patient Related		$119 ($168)	$134 ($161)	$155 ($193)	$90 ($122)		16 (-6, 37)		12 (-9, 33)		39 (7, 71)*		39 (7, 72)*		-31 (-57, -4)*		-29 (-55, -2)*
					Payer Related		$276 ($505)	$412 ($880)	$451 ($770)	$247 ($549)		147 (57, 237)**		145 (51, 238)**		189 (53, 326)**		194 (47, 340)**		-31 (-135, 73)		-29 (-133, 75)
				Per Patient
					Patient Related		$97 ($159)	$111 (155)	$130 ($185)	$71 ($114)		14 (-3, 32)		13 (-4, 30)		34 (7, 60)*		35 (8, 62)*		-26 (-46, -5)*		-24 (-44, -3)*
					Payer Related		$224 ($468)	$342 ($816)	$378 ($725)	$194 ($497)		118 (46, 189)**		118 (44, 192)**		154 (44, 265)**		159 (41, 277)**		-30 (-108, 48)		-27 (-105, 52)
		Total Healthcare Costs, mean (SD)
				Per User
					Patient Related		$295 (330)	$336 (394)	$400 (483)	$285 (392)		40 (-1, 80)		47 (11, 84)**		102 (40, 165)***		112 (55, 169)***		-9 (67, 50)		-8 (-61, 44)
					Payer Related		$660 (1256)	$850 (2057)	$1012 (2354)	$720 (1003)		181 (5, 358)*		211 (51, 370)**		339 (57, 621)**		398 (136, 661)***		61 (-203, 324)		36 (-188, 260)
		Outcome					Bilateral					Moderate				Severe				Indeterminate
							Mild	Moderate	Severe	Indeterminate
							(n = 2149 )	(n = 1420)	(n = 542)	(n = 512)		Unadjusted		Adjusted		Unadjusted		Adjusted		Unadjusted		Adjusted
												(95% CI)		(95% CI)		(95% CI)		(95% CI)		(95% CI)		(95% CI)
		Eye related OP visits, mean (SD)
				Per User
					Patient Related		$235 (319)	$271 (478)	$344 (664)	$238 (415)		36 (8, 63)*		49 (23, 75)***		109 (60, 158)**		125 (78, 172)***		3 (-34, 40)		16 (-18, 50)
					Payer Related		$514 (1941)	$657 (2021)	$839 (2155)	$632 (1753)		144 (9, 279)*		138 (9, 267)*		326 (79, 573)**		313 (80, 546)**		118 (-79, 315)		111 (-76, 297)
			NTG related OP visits as a subset of all eye related OP, mean (SD)
				Per User
					Patient Related		$196 (244)	$211 (289)	$288 (604)	$191 (352)		14 (-6, 35)		31 (13, 48)***		92 (54, 130)***		107 (74, 140)***		-5 (-32, 22)		0 (-22, 23)
					Payer Related		$373 (1631)	$406 (993)	$658 (1943)	$406 (1099)		33 (-60, 127)		66 (-16, 148)		285 (81, 490)***		346 (158, 535)***		33 (-104, 170)		43 (-72, 158)
			Procedure-related OP visits as a subset of all visits, mean (SD)
				Per User
					Patient Related		$236 (343)	$297 (448)	$268 (497)	$173 (257)		61 (-35, 157)		50 (-48, 149)		32 (-76, 139)		18 (-90, 125)		-63 (-169, 44)		-66 (-177, 46)
					Payer Related		$1410 (5345)	$869 (1748)	$1246 (3510)	$1369 (3376)		-541 (-1324, 241)		-801 (-1971, 370)		-164 (-1211, 883)		-486 (-1767, 794)		-41 (-1569, 1487)		-356 (-2050, 1339)
				Per Patient
					Patient Related		$18 (113)	$29 (165)	$39 (212)	$11 (78)		11 (1, 21)*		11 (1, 22)*		22 (1, 42)*		22 (1, 42)*		-6 (-14, 1)		-6 (-14, 1)
					Payer Related		$107 (1515)	$84 (601)	$184 (1412)	$91 (923)		-23 (-94, 49)		-23 (-85, 39)		77 (-105, 259)		75 (-91, 241)		-16 (-118, 86)		-17 (-105, 70)
		Glaucoma related prescriptions, mean (SD)
				Per User
					Patient Related		$131 (185)	$161 (211)	$203 (246)	$130 (158)		32 (16, 48)***		36 (20, 52)***		77.36 (50, 105)***		87 (57, 117)***		-1 (-22, 19)		1 (-20, 21)
					Payer Related		$349 (606)	$422 (681)	$562 (993)	$378 (635)		79 (26, 132)**		88 (31, 146)**		229 (132, 326)**		265 (140, 390)***		31 (-45, 106)		16 (-58, 89)
				Per Patient
					Patient Related		$101 (171)	$135 (202)	$175 (239)	$96 (147)		34 (21, 47)***		37 (24, 51)***		74 (50, 98)***		83 (56, 110)***		-5 (-19, 10)		-3 (-18, 11)
					Payer Related		$268 (551)	$353 (642)	$483 (941)	$279 (570)		86 (43, 128)***		92 (46, 139)***		215 (132, 299)***		238 (132, 343)***		12 (-41, 64)		3 (-49, 55)
		Total Healthcare Costs, mean (SD)
				Per User
					Patient Related		$304 (319)	$355 (386)	$475 (680)	$295 (660)		49 (23, 74)***		69 (47, 91)***		166 (118, 213)***		187 (145, 229)***		-10 (-42, 23)		-1 (-28, 27)
					Payer Related		$659 (1745)	$783 (1264)	$1175 (2222)	$703 (1267)		119 (11, 226)*		173 (68, 278)***		501 (277, 724)***		598 (370, 826)***		45 (-102, 191)		46 (-89, 181)
		Notes: *p < 0.05, **p < 0.01, ***p < 0.001; Payer costs were identified by the net payment variable; patient costs were the total of one's copay, coinsurance, and deductible; per user refers to all patients that used the resource of concern whereas ‘Per Patient’ refers to all patients whether or not they were counted as utilizers. Notably, all patients were users of office visits by design and th…
		Abbreviations: CI, confidence interval; NTG, Normal Tension Glaucoma; OP, outpatient; SD, standard deviation

## Sheet: Interactions
	Table S7. Measuring Impact of Laterality on the Effects of Severity
	HCRU				Esimates (95% CI)
					Moderate	Severe	Indeterminate
	OAG related OP visits				-0.27	-0.07	-0.07
					(-0.4, 0.15)	(-0.64, 0.11)	(-0.48, 0.37)
	NTG related OP visits as a subset of all eye related OP				-0.04	-0.2	-0.02
					(-0.28, 0.21)	(-0.54, 0.14)	(-0.40, 0.38)
	Glaucoma related prescriptions
			Drug Fills		1.12*	0.82**	1.07
					(1.02, 1.23)	(0.73, 0.93)	(0.92, 1.24)
			Days Supply		0.98	0.81**	0.93
					(0.88, 1.10)	(0.70, 0.94)	(0.78, 1.12)
	COSTS				Esimates (95% CI)
					Moderate	Severe	Indeterminate
	OAG related OP visits
			Patient Related		0.98	0.86	1.08
					(0.82, 1.18)	(0.67, 1.10)	(0.81, 1.44)
			Payer Related		1.08	1.44	0.92
					(0.81, 1.45)	(0.96, 2.10)	(0.58, 1.44)
	NTG related OP visits as a subset of all eye related OP
			Patient Related		0.95	1.09	0.95
					(0.82, 1.11)	(0.89, 1.35)	(0.74, 1.21)
			Payer Related		-
	Glaucoma related prescriptions
		Per User
			Patient Related		0.88	0.82	0.79
					(0.73, 1.06)	(0.64, 1.05)	(0.59, 1.07)
			Payer Related
					-
		Per Patient
			Patient Related		-
			Payer Related		-
	Total Healthcare Costs
			Patient Related		0.87*	0.87	0.89
					(0.76, 0.99)	(0.73, 1.04)	(0.72, 1.09)
			Payer Related		1.04	0.78	0.86
					(0.84, 1.29)	(0.59, 1.05)	(0.62, 1.21)
	Notes: Office visits were estimated as marginal counts, all others are reported as incident rate ratios, those with "-" identifies models that would not converge
	Abbreviations: CI, confidence interval; HCRU, healthcare resource utilization; OP, outpatient
